# Supplementary material for: Revealing unique properties of the ribosome using a network based analysis
Source: PubMed Central journal article supplement — Nucleic Acids Res. 2008 Jul 14;36(14):4641–52. doi: 10.1093/nar/gkn433 (PMC2504294; doi:10.1093/nar/gkn433), 2008-07-14
Supplement: gkn433_3.pdf [file gkn433_3.pdf]

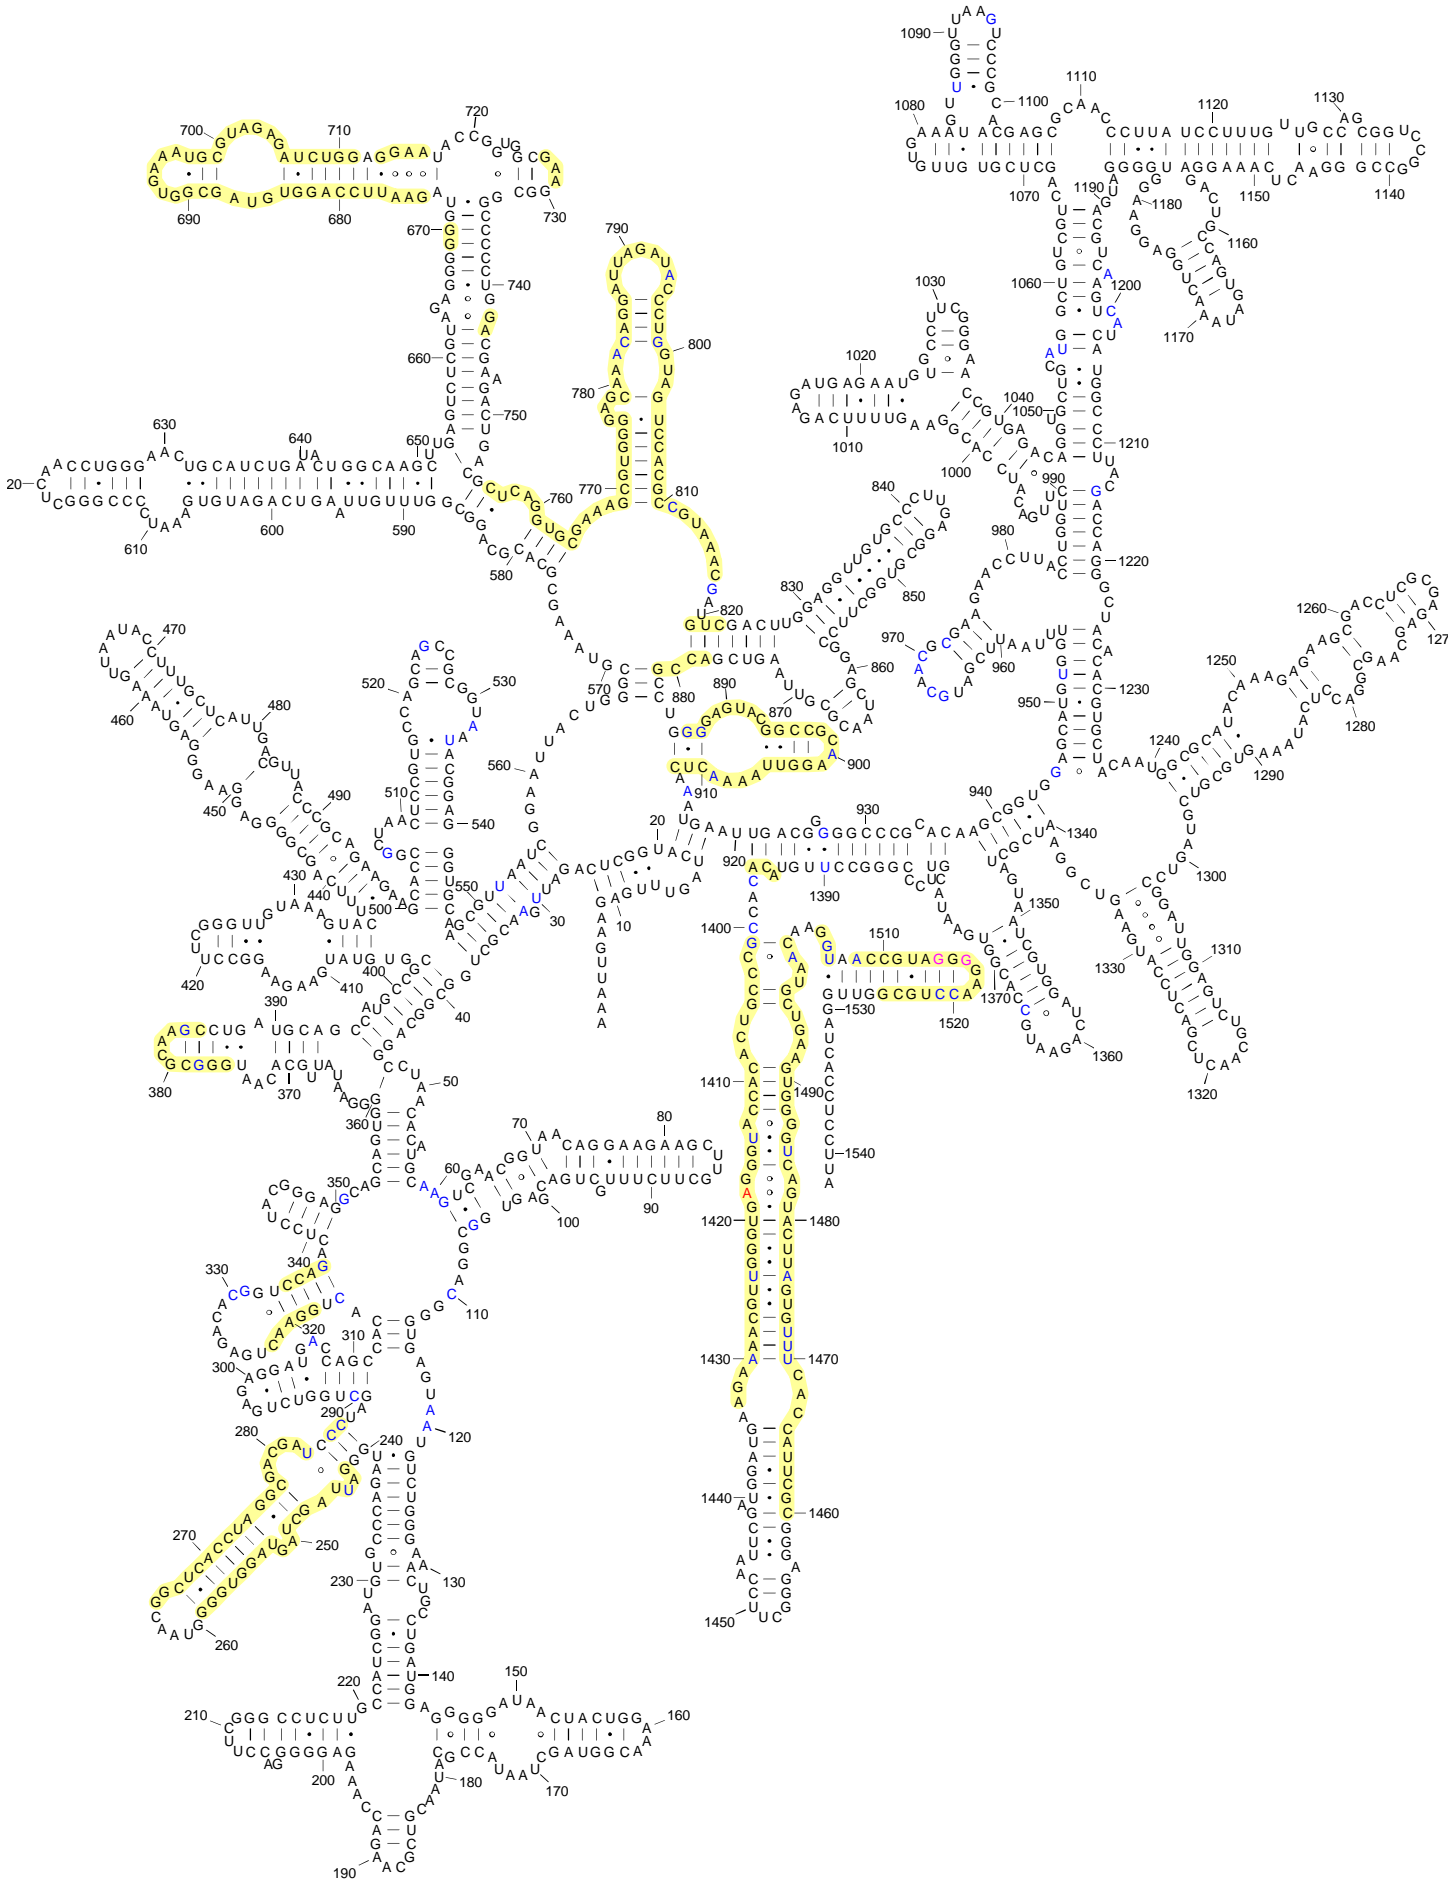

**Figure S4.** Nts with high centrality presented on the *E. coli* 16S rRNA secondary structure. Centrality measures (closeness, betweenness, degree) were calculated for the PDB codes 2AVY and 2AW4. Subunits interface region is highlighted yellow. Nts with significant high closeness values (top 5%) are colored red. Nts with significant high betweenness values (top 5%) are colored blue. Nts with significant high closeness and betweenness values (top 5%) are colored magenta.
